1 Strong isolation by distance and evidence of population microstructure reflect ongoing  
2 *Plasmodium falciparum* transmission in Zanzibar

3  
4 Sean V. Connelly<sup>1</sup>, Nicholas F. Brazeau<sup>1</sup>, Mwinyi Msellem<sup>2</sup>, Billy E. Ngasala<sup>3,14</sup>, Özkan Aydemir<sup>8</sup>, Varun  
5 Goel<sup>5</sup>, Karamoko Niaré<sup>4</sup>, David J. Giesbrecht<sup>4</sup>, Zachary R. Popkin-Hall<sup>7</sup>, Christopher M. Hennelly<sup>7</sup>,  
6 Zackary Park<sup>6</sup>, Ann M. Moormann<sup>8</sup>, John Michael Ong'echa<sup>9</sup>, Robert Verity<sup>10</sup>, Safia Mohammed<sup>11</sup>, Shija J.  
7 Shija<sup>11</sup>, Lwidiko E. Mhamilawa<sup>3,14</sup>, Ulrika Morris<sup>12</sup>, Andreas Mårtensson<sup>14</sup>, Jessica T. Lin<sup>6</sup>, Anders  
8 Björkman<sup>12,13</sup>, Jonathan J. Juliano<sup>6,15,16\*</sup>, Jeffrey A. Bailey<sup>4\*</sup>

9  
10 1: MD-PhD Program, University of North Carolina, Chapel Hill, NC 27599

11 2: Research Division, Ministry of Health, Zanzibar, Tanzania

12 3: Department of Parasitology and Medical Entomology, Muhimbili University of Health and Allied  
13 Sciences, Dar es Salaam, Tanzania

14 4: Department of Pathology and Laboratory Medicine, Brown University, Providence, RI, 02912 USA

15 5: Carolina Population Center, University of North Carolina, Chapel Hill, NC 27599

16 6: Division of Infectious Diseases, Department of Medicine, School of Medicine, University of North  
17 Carolina at Chapel Hill, Chapel Hill, NC, 27599 USA

18 7: Institute for Global Health and Infectious Diseases, School of Medicine, University of North Carolina at  
19 Chapel Hill, Chapel Hill, NC, 27599 USA

20 8: Department of Medicine, University of Massachusetts Chan Medical School, Worcester, MA

21 9: Center for Global Health Research, Kenyan Medical Research Institute, Kisumu, Kenya

22 10: MRC Centre for Global Infectious Disease Analysis, Imperial College, London

23 11: Zanzibar Malaria Elimination Program (ZAMEP), Zanzibar, Tanzania

24 12: Department of Microbiology, Tumor and Cell Biology, Karolinska Institutet, 17177 Stockholm, Sweden

25 13: Department of Global Public Health, Karolinska Institutet, Stockholm, Sweden.

26 14: Global Health and Migration Unit, Department of Women's and Children's Health, Uppsala University,  
27 Uppsala, Sweden

28 15: Department of Epidemiology, Gillings School of Global Public Health, University of North Carolina,  
29 Chapel Hill, 27599 USA

30 16: Curriculum in Genetics and Molecular Biology, University of North Carolina, Chapel Hill, NC 27599  
31 USA

32

33 \*: co-senior authors

34

35 Keywords: *Plasmodium falciparum*, malaria, population microstructure, Tanzania, Zanzibar, molecular  
36 inversion probes

37 **ABSTRACT**

38 The Zanzibar archipelago of Tanzania has become a low-transmission area for *Plasmodium falciparum*.  
39 Despite being considered an area of pre-elimination for years, achieving elimination has been difficult,  
40 likely due to a combination of imported infections from mainland Tanzania, and continued local  
41 transmission. To shed light on these sources of transmission, we applied highly multiplexed genotyping  
42 utilizing molecular inversion probes to characterize the genetic relatedness of 282 *P. falciparum* isolates  
43 collected across Zanzibar and in Bagamoyo District on the coastal mainland from 2016-2018. Overall,  
44 parasite populations on the coastal mainland and Zanzibar archipelago remain highly related. However,  
45 parasite isolates from Zanzibar exhibit population microstructure due to rapid decay of parasite  
46 relatedness over very short distances. This, along with highly related pairs within *shehias*, suggests  
47 ongoing low level local transmission. We also identified highly related parasites across *shehias* that reflect  
48 human mobility on the main island of Unguja and identified a cluster of highly related parasites, suggestive  
49 of an outbreak, in the Micheweni district on Pemba island. Parasites in asymptomatic infections  
50 demonstrated higher complexity of infection than those in symptomatic infections, but have similar core  
51 genomes. Our data support importation as a main source of genetic diversity and contribution to the  
52 parasite population on Zanzibar, but they also show local outbreak clusters where targeted interventions  
53 are essential to block local transmission. These results highlight the need for preventive measures against  
54 imported malaria and enhanced control measures in areas that remain receptive for malaria reemergence  
55 due to susceptible hosts and competent vectors.

## 56 INTRODUCTION

57 Malaria cases in Tanzania comprise 3% of globally reported cases, but transmission is heterogeneous,  
58 with the coastal mainland witnessing declining but substantial transmission of *Plasmodium falciparum*  
59 (Alegana et al., 2021; World Health Organization, 2022). On the other hand, the archipelago of Zanzibar is  
60 a pre-elimination setting, with low level seasonal transmission (Björkman et al., 2019). This is largely due  
61 to the routine implementation of a combination of effective control measures, including robust vector  
62 control and routine access to effective antimalarials (Björkman et al., 2019). Despite these efforts, malaria  
63 has been difficult to eliminate from the archipelago. There are several reasons this may be the case: (1)  
64 frequent importation of malaria from moderate or high transmission regions of mainland Tanzania and  
65 Kenya (Björkman et al., 2019; Le Menach et al., 2011; Lipner et al., 2011; Monroe et al., 2019; Morgan et  
66 al., 2020; Tatem et al., 2009); (2) ongoing local transmission due to residual vector capacity despite strong  
67 vector control (Björkman et al., 2019); and (3) a reservoir of asymptomatic infections (Björkman & Morris,  
68 2020; Björkman et al., 2019).

69  
70 Parasite genomics has the potential to help us better understand malaria epidemiology by uncovering  
71 population structure and gene flow, providing insight into changes in the parasite population including how  
72 parasites move between regions (Neafsey et al., 2021). Genomics has previously been used to study  
73 importation and transmission chains in other low transmission settings in Africa and elsewhere (H. H.  
74 Chang et al., 2019; Fola et al., 2023; Morgan et al., 2020; Patel et al., 2014; Roh et al., 2019; Sane et al.,  
75 2019). Previously, we had investigated the importation of malaria into Zanzibar from the mainland using  
76 whole genome sequencing, showing highly similar populations within the mainland and within the  
77 archipelago, but also identifying highly related parasite pairs between locations suggesting a role for  
78 importation (Morgan et al., 2020). However, this work lacked sufficient samples to assess transmission of  
79 parasites within Zanzibar. The larger and spatially rich sample set analyzed in this manuscript offers an  
80 opportunity for more refined analyses of transmission across Zanzibar and how parasites are related to  
81 those from coastal mainland.

82 A panel of molecular inversion probes (MIPs), a highly multiplexed genotyping assay, were designed in a  
83 previous study to target single nucleotide polymorphisms (SNPs) throughout the *P. falciparum* genome  
84 (Aydemir et al., 2018). We leveraged this assay to investigate the genetic epidemiology of parasites in the  
85 coastal mainland and Zanzibar utilizing 391 samples collected from cross-sectional surveys of both  
86 asymptomatic infections and symptomatic, uncomplicated malaria cases during 2016-2018. Specifically,  
87 we use identity by descent analyses to compare the genetic relatedness of mainland and Zanzibari  
88 parasites, and to investigate the geography/spatial relationships of genetically related parasites on the  
89 archipelago. We further characterize how the genetic complexity of infections differ by clinical status and  
90 describe patterns of antimalarial drug resistance polymorphisms in the parasite populations. In this low  
91 transmission setting, these analyses characterize fine-scale local parasite populations that contribute to  
92 continued transmission within the region, highlighting a key barrier to malaria elimination in the Zanzibar  
93 archipelago.

## 94 METHODS

95 Samples from coastal Tanzania (178) and Zanzibar (213) were previously sequenced through multiple  
96 studies (**Table 1, Supplemental Figure 1**). These samples include 213 dried blood spots (DBS) collected  
97 in Zanzibar between February 2016 and September 2017, coming from cross-sectional surveys of  
98 asymptomatic individuals ( $n = 70$ ) and an *in vivo* efficacy study of artesunate-amodiaquine (ASAQ) with  
99 single low dose primaquine (SLDP) in pediatric uncomplicated malaria patients in the western and central  
100 districts of Unguja island and Micheweni District on Pemba island ( $n = 143$ ) (Msellem et al., 2020). These  
101 samples were geolocalized to *shehias*, the lowest geographic governmental designation of land in  
102 Zanzibar, across its two main islands, Unguja and the northern region of Pemba (**Supplemental Figure**  
103 **1**). Mainland Tanzania samples were collected in rural Bagamoyo District, where malaria transmission  
104 persists, and residents frequently travel to Dar es Salaam, the major port from where travelers depart for  
105 Zanzibar. Of the mainland Bagamoyo samples, 138 were whole blood collected from 2015-2017 as part of  
106 an *in vivo* efficacy study of artemether-lumefantrine (AL) in pediatric uncomplicated malaria patients  
107 (Topazian et al., 2022), and the remaining 40 samples were leukodepleted blood collected in 2018 from  
108 asymptomatic but RDT-positive children who participated in a study investigating the transmission of *P.*  
109 *falciparum* to colony reared mosquitos. This project leveraged molecular inversion probe (MIP) data from  
110 SRA including PRJNA926345, PRJNA454490, PRJNA545345, and PRJNA545347.

111

112 In order to place coastal Tanzanian and Zanzibari samples in the context of African *P. falciparum*  
113 population structure across multiple regions, MIP data from 147 whole blood samples collected in Ahero  
114 District, Kenya from the same parasite clearance study were used (Topazian et al., 2022) in conjunction  
115 with a subset of data from 2,537 samples genotyped for a study of the 2013 Demographic Health Survey  
116 of the Democratic Republic of the Congo which included samples from DRC, Ghana, Tanzania, Uganda  
117 and Zambia (Verity et al., 2020) (see **Supplemental Figure 2**).

118

119 Molecular Inversion Probe (MIP) Sequencing: Sequence data for the coastal Tanzanian and Zanzibari  
120 samples were generated in a similar fashion across studies. Chelex extracted DNA from DBS and Qiagen

121 Miniprep (Qiagen, Germantown, MD) extracted DNA from leukodepleted blood were used in MIP  
122 captures, which were then sequenced as previously described (Aydemir et al., 2018; Verity et al., 2020).  
123 Control mixtures of 4 strains of genomic DNA from *P. falciparum* laboratory lines were also sequenced as  
124 described previously (Verity et al., 2020). We utilized two MIP panels, one being a genome-wide single  
125 nucleotide polymorphism (SNP) MIP panel and the second being a panel with the known drug resistance  
126 markers in *Plasmodium falciparum* (Verity et al., 2020). These libraries were sequenced on Illumina  
127 Nextseq 500 instrument using 150bp paired end sequencing with dual indexing using Nextseq 500/550  
128 Mid-output Kit v2.

129

### 130 MIP variant Calling and Filtering:

131 MIP sequencing data was processed using *MIPTools* (<https://github.com/bailey-lab/MIPTools>), which first  
132 merges reads and removes errors and Unique Molecular Identifier (UMI) redundancy with *MIPWrangler*  
133 (Aydemir, unpublished). For the genome-wide panel, variant calling was performed using *FreeBayes* within  
134 *MIPTools*, for a pooled continuous sample that was filtered for a minimum UMI depth of 10, a within  
135 sample allele frequency threshold of 0.01 and a minimum alternate read count of 2 to obtain 5174 variant  
136 SNP sites. Utilizing *bcftools* (version 1.15.1), the samples and loci were filtered to only the known targeted  
137 SNPs, requiring a minor allele frequency threshold of 0.01, a sample missingness threshold of 10% and  
138 loci missingness threshold of 15%. After filtering and subsetting to biallelic sites, 282 samples were left at  
139 1270 loci. The final numbers of samples used for analysis by group are shown in **Table 1**. Sequencing  
140 coverage estimates for loci are shown in **Supplemental Figure 3**.

141 For the drug resistance panel, variant calling was performed as above, with additional *FreeBayes*  
142 parameters of a haplotype length of 3 and using the 30 best alleles at a given locus. Three aggregate  
143 amino acid summary tables were created with reference amino acid UMI counts, alternate amino acid UMI  
144 counts and the coverage depth for each variant, for a total of 309 samples at 2265 SNPs. We focused  
145 analysis on the following key known and putative drug resistance molecular marker genes and  
146 corresponding mutations: *P. falciparum* (*Pf*) chloroquine resistance transporter (*Pf*cr: C72S, M74I, N75E,  
147 K76T, T93S, H97Y, F145I, I218F, A220S, Q271E, N326S, M343L, C350R, G353V, I356T, R371I), *Pf*

148 multidrug resistance 1 (Pfm<sub>1</sub>: N86Y, Y184F, S1034C, N1042D, D1246Y), *Pf* dihydrofolate reductase  
149 (Pfdhfr: A16V, N51I, C59R, S108N, I164L), *Pf* dihydropteroate synthase (Pfdhps: S436A, S436F, A437G,  
150 K540E, A581G, A613T, A613S), *Pf* cytochrome *b* (Pfcy<sub>tb</sub>: Y268N, Y268S, Y268C) and *Pf* kelch 13 (Pfk<sub>13</sub>:  
151 P441L, F446I, G449A, N458Y, C469F, C469Y, M476I, A481V, Y493H, R515K, P527H, N537I, N537D,  
152 G538V, R539T, I543T, P553L, R561H, V568G, P574L, C580Y, R622I, A675V) (World Health  
153 Organization, 2020). Prevalence was calculated separately in Zanzibar or mainland Tanzania for each  
154 polymorphism by the number of samples with alternative genotype calls for this polymorphism over the  
155 total number of samples genotyped and an exact 95% confidence interval using the Pearson-Klopper  
156 method was calculated for each prevalence.

157

### 158 Analysis of Population Relatedness and Structure

159 To investigate genetic relatedness of parasites across regions, identity by descent (IBD) estimates were  
160 assessed using the within sample major alleles (coercing samples to monoclonal by calling the dominant  
161 allele at each locus) and estimated utilizing a maximum likelihood approach using the *inbreeding\_mle*  
162 function from the *MIPanalyzer* package (Verity et al., 2020). This approach has previously been validated  
163 as a conservative estimate of IBD (Verity et al., 2020). Next, Principal Component Analysis (PCA) was  
164 performed to query the comparative genetic variation of the samples through utilizing the genome-wide  
165 SNP panel. We pruned 51 samples that had a pairwise IBD of greater than 0.90 to one randomly selected  
166 sample as a representative of the clonal population to avoid clonal structure from dominating the analysis.  
167 Within-sample allele frequencies were calculated, with an imputation step replacing missing values with  
168 the median per each locus, and PCA was performed using the *prcomp* function (Verity et al., 2020) (*R*  
169 version 4.2.1).

170 To include geographic information with querying genetic variation, Discriminant Analysis of Principal  
171 Components (DAPC) analysis was used (Jombart, 2008). Pseudohaplotypes were created by pruning the  
172 genotype calls at all loci for each sample into a single haplotype, and redundant haplotypes were removed  
173 (282 reduced to 272 with unique pseudohaplotypes). DAPC was conducted at the district level, and  
174 samples from districts with less than five samples (272 samples to 270 samples in 6 districts) were

175 retained (**Supplemental Figure 4B**). For the main DAPC analysis (**Figure 1B**), highly related isolates  
176 were pruned to a single representative infection (272 reduced to 232) and then included districts with at  
177 least 5 samples (232 reduced to 228 samples in 5 districts). The DAPC was performed using the  
178 *adegenet* package (Jombart, 2008) with the first 80 PCs based on the cross-validation function *xvalDapc*.  
179 To perform K-means clustering, a cluster K of 1 was assigned to the mainland samples while the *kmeans*  
180 package was used to find the optimal K to cluster the Zanzibar *shehias* by latitude and longitude. The K-  
181 means clustering experiment was used to cluster a continuous space of geographic coordinates in order  
182 to compare genetic relatedness in different regions. We selected K = 4 as the inflection point based on the  
183 elbow plot (**Supplemental Figure 5**) and based the number to obtain sufficient subsections of Zanzibar to  
184 compare genetic relatedness.

185 To investigate how genetic relatedness varies as distance between pairs increases, isolation by distance  
186 was performed across all of Zanzibar and within the islands of Unguja and Pemba. The greater circle (GC)  
187 distances between each *shehia* centroid were calculated (within *shehia* distances were equal to 0) to find  
188 the distance between each *shehia* in geographic space. Distances were then binned at increments  
189 reflecting the max GC distances between regions, which was smallest in Pemba at 12km and much larger  
190 for both Unguja (58km) and all of Zanzibar (135km). Within each binned group, mean IBD with 95% CIs  
191 are plotted. For graphing IBD connections at the between and within *shehia* level, an IBD threshold of 0.25  
192 (half-siblings) or greater was used (**Figure 4, Supplemental Figure 6, Supplemental Figure 7**). In  
193 graphing IBD connections at larger distances between islands or between coastal mainland Tanzania and  
194 Zanzibar, a between IBD value of 0.125 (quarter-siblings) or greater was used (**Supplemental Figure 8,**  
195 **Supplemental Figure 9**). These plots were created utilizing *ggraph* in *R* with the nodes being samples  
196 and the edges being IBD estimates.

197 Complexity of Infection (COI), or the number of parasite clones in a given sample, was determined using  
198 *THE REAL McCOIL* (v2) categorical method (H.-H. Chang et al., 2017) and the 95% CI was calculated  
199 utilizing a nonparametric bootstrap. Fws statistic, which is used to compare the diversity within and  
200 between samples in a population, was calculated in *R* version 4.2.1 through the formula,  $(1 - H_w)/H_p$ ,  
201 where  $H_w$  is the within-sample heterozygosity and  $H_p$  is the heterozygosity across the population, and



202 95% CIs were calculated utilizing a nonparametric bootstrap. The mean prevalence of antimalarial drug  
203 resistance polymorphisms and 95% CIs were calculated using a nonparametric bootstrap method.

## 204 RESULTS

205 Zanzibari falciparum parasites were closely related to coastal mainland parasites but showed higher within  
206 than between population IBD and evidence of microstructure on the archipelago. To examine geographic  
207 relatedness, we first used principal component analysis (PCA). Zanzibari parasites are highly related to  
208 other parasites from East Africa and more distantly related to Central and West African isolates  
209 (**Supplemental Figure 2**). PCA analysis of 232 coastal Tanzanian and Zanzibari isolates, after pruning 51  
210 samples with an IBD of greater than 0.9 to one representative sample, demonstrates little population  
211 differentiation (**Figure 1A**).

212 However, after performing K-means clustering of *shehias* in Zanzibar and mainland Tanzania, parasites  
213 within each population show more highly related pairs within their respective clusters than between  
214 clusters (**Figure 2**). Comparisons of parasite pairs between Zanzibar and coastal Tanzania showed no  
215 pairs with an IBD greater than 0.20 (**Figure 2, Supplemental Figure 8**). Similarly, no pairs with an IBD of  
216 0.20 or greater were present in pairwise comparisons between Unguja and Pemba (**Supplemental Figure**  
217 **9**).

218 To further assess the differentiation within the parasite population in Zanzibar, we conducted Discriminant  
219 Analysis of Principal Components (DAPC) according to the districts of origin for each isolate. Parasites  
220 differentiated geographically, with less variation near the port of Zanzibar town and more differentiation in  
221 isolates collected in districts further from the port (**Figure 1B**). This underlying microstructure is also  
222 supported by classic isolation by distance analysis (**Figure 3, Supplemental Figure 10**). Isolation by  
223 distance analysis across all of Zanzibar and within Unguja showed rapid decay of relatedness over very  
224 short geographic distances (**Figure 3A and 3B**). Interestingly in Pemba, mean IBD remained at a similar  
225 relatively high level even at longer distances (**Figure 3C**).

226 Within Zanzibar, parasite clones are shared within and between shehias suggesting local outbreaks.

227 Among the sample pairs in Zanzibar that are highly related (IBD of 0.25 or greater), we see different  
228 patterns of genetic relatedness suggesting common local and short distance transmission of clones and

229 occasional long distance transmission (**Figure 4**). In Unguja (**Figure 4A**), we see multiple identical or near  
230 identical parasite pairs shared over longer distances, suggesting longer distance gene flow, as well as  
231 multiple *shehias* containing highly related pairs. In Northern Pemba, there is one large cluster of highly  
232 related parasites shared within and between six *shehias* (**Figure 4B**). Network analysis (**Figure 4C**) for all  
233 sample pairs with an IBD of greater than 0.25 from these *shehias* illustrates this, with pairs linked by  
234 yellow lines showing the highest IBD. The largest network represents two highly related clusters (groups  
235 linked by yellow edges, mean IBD of 0.99) connected by a highly related intermediate (FMH42),  
236 suggesting that the clusters are related though parasites that have recombined while on the archipelago.  
237 FMH42 links the lower cluster with pairwise IBD of 0.65 and the upper cluster with a pairwise IBD of 0.27.  
238 These symptomatic isolates collected from February 2016 to September 2017 in northern Pemba likely  
239 derive from sustained transmission from a seeding event.

240 Network analysis of within *shehia* pairwise IBD sharing in Unguja again shows that there is close  
241 relatedness on this small geographic scale (**Supplemental Figure 6**). A cluster of four isolates in the  
242 Shakani *shehia* on Unguja island with pairwise IBDs of 0.99 likely reflects ongoing transmission within  
243 Shakani, with similar connections in Bambi and Dimani. Meanwhile, a few distant connections likely reflect  
244 the extent of human mobility on the island (**Figure 4A**). Similar within district networks on the mainland are  
245 shown in **Supplemental Figure 7**.

246 Compared to symptomatic infections, asymptomatic infections demonstrate greater genetic complexity,  
247 especially in coastal Tanzania. Asymptomatic infections were compared to roughly contemporaneously  
248 collected isolates from those presenting with acute, uncomplicated malaria. Asymptomatic infections  
249 demonstrated greater COI than symptomatic infections, on both the coastal mainland (mean COI 2.5 vs.  
250 1.7,  $p < 0.05$ , Wilcoxon-Mann-Whitney test) and in Zanzibar (mean COI 2.2 vs. 1.7,  $p = 0.05$ , Wilcoxon-  
251 Mann-Whitney test) (**Figure 5A**). A similar pattern was seen when evaluating Fws, which measures the  
252 diversity within a sample compared to the population, with lower Fws in asymptomatic samples consistent  
253 with higher within host complexity, with a more pronounced difference on the mainland (**Figure 5B**).  
254 Despite these differences, parasites from asymptomatic and symptomatic infections tended to cluster

255 together in PCA analysis, suggesting their core genomes are genetically similar and do not vary based on  
256 clinical status (**Figure 1A**).

257 *Drug resistance mutations did not vary between populations.* The prevalence of the drug resistance  
258 genotypes were quite similar in Zanzibar and coastal Tanzania (**Table 2**). The frequencies of five  
259 mutations associated with sulfadoxine/pyrimethamine resistance (Pfdhfr: N51I, C59R, S108N, Pfdhps:  
260 A437G, K540E) were quite high with prevalences at or above 0.90. Pfcrt mutations associated with  
261 chloroquine and amodiaquine resistance (M74I, N75E, K76T) were all present at approximately 0.05  
262 prevalence (Djimdé et al., 2001; Holmgren et al., 2006). For Pfmdr1, wild type N86 and D1246 were  
263 dominant at 0.99 prevalence, which are associated with reduced susceptibility to lumefantrine (Sisowath  
264 et al., 2005). No World Health Organization validated or candidate polymorphism in Pfk13 associated with  
265 artemisinin resistance were found.

266

## 267 DISCUSSION

268 In this study, we leverage high-throughput targeted sequencing using molecular inversion probes (MIPs)  
269 to characterize the populations and the relationships of *P. falciparum* isolates in Zanzibar and coastal  
270 mainland Tanzania. The parasite populations appear to be highly related to each other (**Figure 1A**) when  
271 evaluated using SNPs in the core genome. Interestingly, within Zanzibar, structure could be observed,  
272 with parasites closer to the main ferry terminal in Zanzibar town clustered more closely with coastal  
273 mainland parasites (**Figure 1B, Supplemental Figure 1**) compared to parasites that were more  
274 geographically distant. This, in combination with the evidence of rapid decline of genetic relatedness with  
275 distance on the archipelago (**Figure 3**), is consistent with population microstructure within the island chain.  
276 This microstructure within the archipelago is supported by K-means clustering where Zanzibari isolates  
277 show higher within cluster than between cluster IBD (**Figure 2**). It is also consistent with isolates with  
278 higher IBD (**Figure 4A and B**) in Unguja and Pemba compared to a maximum IBD of 0.20 between  
279 Zanzibar and coastal mainland Tanzania (**Supplemental Figure 8**) or between Unguja and Pemba  
280 (**Supplemental Figure 9**). Parasite populations within the very low transmission region of Zanzibar may  
281 be more isolated than expected, allowing them to differentiate from each other. This may be indicative of  
282 very effective local malaria control, yet with continued micro-transmission remaining. Thus, directly  
283 targeting local malaria transmission, including the asymptomatic reservoir which contributes to sustained  
284 transmission (Barry et al., 2021; Sumner et al., 2021), may be an important focus for ultimately achieving  
285 malaria control in the archipelago (Björkman & Morris, 2020). Currently, a reactive case detection program  
286 within index case households is being implemented, but local transmission continues and further  
287 investigation into how best to control this is warranted ([Mkali et al., 2023](#)).

288 Despite the overall genetic similarity between archipelago populations, we did not find parasite pairs with  
289 high levels of IBD between the coastal mainland and Zanzibar, with the highest being 0.20. While this  
290 level still represents a significant amount of genetic sharing, similar to a cousin, the lack of higher levels  
291 does not allow us to identify specific importation events. This is largely due to the study design, which is

292 based on convenience sampling, the relatively low numbers of samples and lack of sampling from all  
293 mainland travel hubs (Bisanzio et al., 2023). Sampling was also denser in Unguja compared to Pemba.  
294 On the other hand, we see clear transmission of highly related parasites within each population (IBD >  
295 0.99). In Zanzibar, highly related parasites mainly occur at the range of 20-30km. These results are similar  
296 to our previous work using whole genome sequencing of isolates from Zanzibar and mainland Tanzania,  
297 showing increased within population IBD compared to between population IBD (Morgan et al., 2020). The  
298 network of highly related *P. falciparum* parasites from 6 *shehias* in North Pemba provides an excellent  
299 example of likely recent near clonal transmission, consistent with an outbreak (**Figure 4C**). A recent study  
300 investigating population structure in Zanzibar also found local population microstructure in Pemba  
301 (Holzschuh et al., 2023). Further, both studies found near-clonal parasites within the same district,  
302 Micheweni, and found population microstructure over Zanzibar. Overall, given the findings of  
303 microstructure with significant local sharing of highly related strains, these small clusters still potentially  
304 drive much of the malaria transmission that occurs within the archipelago through routine human  
305 movement or mosquito travel between locales (Huestis et al., 2019). Less frequent longer distance  
306 transmission events also occur, likely due to longer range human migration within the islands.

307 Asymptomatic parasitemia has been shown to be common in falciparum malaria around the globe and has  
308 been shown to have increasing importance in Zanzibar (Lindblade et al., 2013; Morris et al., 2015). What  
309 underlies the biology and prevalence of asymptomatic parasitemia in very low transmission settings where  
310 anti-parasite immunity is not expected to be prevalent remains unclear (Björkman & Morris, 2020). Similar  
311 to a few previous studies, we found that asymptomatic infections had a higher COI than symptomatic  
312 infections across both the coastal mainland and Zanzibar parasite populations (Collins et al., 2022;  
313 Kimenyi et al., 2022; Sarah-Matio et al., 2022). Other studies have found lower COI in severe vs. mild  
314 malaria cases (Robert et al., 1996) or no significant difference between COI based on clinical status  
315 (Conway et al., 1991; Earland et al., 2019; Kun et al., 1998; Lagnika et al., 2022; Tanabe et al., 2015). In  
316 Zambia, one study suggested that infections that cause asymptomatic infection may be genetically  
317 different than those that cause symptomatic infection (Searle et al., 2017). However, this study included

318 samples collected over different time periods and relied on a low-density genotyping assay which only  
319 investigated the diversity of 24 single nucleotide polymorphisms across the genome. Here, based on  
320 SNPs throughout the core genome, we did not see differential clustering of asymptomatic or symptomatic  
321 infections in Zanzibar or the mainland (**Figure 1A**), suggesting that these parasite populations remain  
322 similar when comparing clinical status. However, this genotyping approach does not address potential  
323 variation in the many hypervariable gene families that encode genes known to be associated with  
324 pathogenesis (e.g. *var*, *rifin* and *stevor* genes) and does not address differences in expression of genes  
325 associated with pathogenesis that may reflect differences in the populations. Investigation with other  
326 methods, such as long-read genome sequencing and transcriptional profiling, would be needed to address  
327 these differences.

328 While mutations for partial artemisinin resistance were not observed in K13, other antimalarial resistant  
329 mutations of concern were observed. Validated drug resistance mutations linked to  
330 sulfadoxine/pyrimethamine resistance (Pfdhfr-N51I, Pfdhfr-C59R, Pfdhfr-S108N, Pfdhps-A437G, Pfdhps-  
331 K540E) were found at high prevalence (**Table 2**). Prevalence of polymorphisms associated with  
332 amodiaquine resistance (Pfcrt-K76T, Pfmdr1-N86Y, Pfmdr1-Y184F, Pfmdr1-D1246Y) were seen at similar  
333 proportions as previous reports (Msellem et al., 2020). The wild-type Pfmdr1-N86 was dominant in both  
334 mainland and archipelago populations, concerning for reduced lumefantrine susceptibility. Although  
335 polymorphisms associated with artemisinin resistance did not appear in this population, continued  
336 surveillance is warranted given emergence of these mutations in East Africa and reports of rare resistance  
337 mutations on the coast consistent with spread of emerging Pfk13 mutations (Moser et al., 2021).

338 Overall, parasites between Zanzibar and coastal mainland Tanzania remain highly related, but population  
339 microstructure on the island reflects ongoing low level transmission in Zanzibar, partially driven by  
340 asymptomatic infections that potentially constitute a long-term reservoir. This is likely the result of the  
341 continued pressure on the population through the implementation of effective control measures. In this  
342 study, parasite genomics allows us to parse differences in parasite populations and reveals substructure  
343 in an area of low transmission intensity. A recent study identified “hotspot” *shehias*, defined as areas with

344 comparatively higher malaria transmission than other *shehias*, near the port of Zanzibar town and in  
345 northern Pemba (Bisanzio et al., 2023). These regions overlapped with *shehias* in this study with high  
346 levels of IBD, especially in northern Pemba (**Figure 4**). These areas of substructure represent parasites  
347 that differentiated in relative isolation and are thus important locales to target intervention to interrupt local  
348 transmission (Bousema et al., 2012). While a field cluster-randomized control trial in Kenya targeting these  
349 hotspots did not confer much reduction of malaria outside of the hotspot (Bousema et al., 2016), if areas  
350 are isolated pockets, which genetic differentiation can help determine, targeted interventions in these  
351 areas are likely needed, potentially through both mass drug administration and vector control (Morris et  
352 al., 2018; Okell et al., 2011). Such strategies and measures preventing imported malaria could accelerate  
353 progress towards zero malaria in Zanzibar.



354 **ETHICAL APPROVALS AND CONSENT TO PARTICIPATE**

355 This analysis was approved by the IRBs at the University of North Carolina at Chapel Hill (15-1989, 17-  
356 0166, 18-1090), Muhimbili University of Health and Allied Sciences (MUHAS), Zanzibar Medical Research  
357 Ethical Committee and the Regional Ethics Review Board, Stockholm, Sweden.

358

359 **COMPETING INTERESTS**

360 The authors have no competing interests to declare.

361

362 **ACKNOWLEDGEMENTS**

363 This research was funded by the National Institutes of Health, grants R01AI121558, R01AI137395,  
364 R01AI155730, F30AI143172 and K24AI134990. Funding was also contributed from the Swedish  
365 Research Council, Erling-Persson Family Foundation and the Yang Fund. RV acknowledges funding from  
366 the MRC Centre for Global Infectious Disease Analysis (reference MR/R015600/1), jointly funded by the  
367 UK Medical Research Council (MRC) and the UK Foreign, Commonwealth & Development Office (FCDO),  
368 under the MRC/FCDO Concordat agreement and is also part of the EDCTP2 programme supported by the  
369 European Union. RV also acknowledges funding by Community Jameel. We would like to thank the  
370 communities and participants who took part in these studies. We would like to thank Abebe Fola for his  
371 assistance.

372

373 **ORCID**

374 Sean V. Connelly: 0000-0002-7330-7340

375 Nicholas F. Brazeau: 0000-0003-3976-7965

376 Billy E. Ngasala: 0000-0001-9300-7719

377 Ozkan Aydemir: 0000-0002-3458-6527

378 Varun Goel: 0000-0002-2933-427X

379 Karamoko Niaré: 0000-0002-7406-9508

380 David J. Giesbrecht: 0000-0003-2498-4705

- 381 Zachary R. Popkin-Hall: 0000-0002-8308-5294
- 382 Christopher M. Hennelly: 0000-0001-5325-6753
- 383 Zackary Park: 0000-0002-4743-6624
- 384 Ann M. Moormann: 0000-0003-1113-2829
- 385 John Michael Ong'echa: 0000-0003-3928-6774
- 386 Robert Verity: 0000-0002-3902-8567
- 387 Ulrika Morris: 0000-0003-4734-5754
- 388 Jessica T. Lin: 0000-0002-4516-723X
- 389 Anders Björkman: 0000-0002-8882-130X
- 390 Jonathan J. Juliano: 0000-0002-0591-0850
- 391 Jeffrey A. Bailey: 0000-0002-6899-8204

392 **DATA ACCESSIBILITY STATEMENT**

393 Parasite sequence data is available through SRA (BioProject PRJNA926345). Code used for analysis is  
394 available at: [github.com/sconnelly007/TAN\\_MIP](https://github.com/sconnelly007/TAN_MIP).

395

396 **AUTHOR CONTRIBUTIONS**

397 SVC, NB, VG and ZPH conducted analysis and wrote the manuscript. OA, DG, KN, CH and ZP assisted  
398 with analysis and participated in manuscript preparation. BN, LEM, SA, SS, MM, UM, AM, and JMO ran  
399 the studies in Tanzania and Kenya from which data is derived and participated in manuscript preparation.  
400 AB, AM, RV, JTL, JAB and JJJ helped conceive the study, contributed to the experimental design, and  
401 wrote the manuscript.

402 **TABLES**

403

404

**Table 1. Blood samples from Zanzibar and coastal Tanzania.**

| Description                                                                                                                                       | Location (District) | Dates | Clinical status† | Sample Size | Age Range (yr) | # in Genome Wide Analysis | # in Drug Resistance Analysis |
|---------------------------------------------------------------------------------------------------------------------------------------------------|---------------------|-------|------------------|-------------|----------------|---------------------------|-------------------------------|
| Community cross-sectional surveys                                                                                                                 | Zanzibar (Multiple) | 2016  | A                | 70          | 2-70           | 21                        | 52                            |
| <i>in vivo</i> efficacy study of artesunate-amodiaquine (ASAQ) with single low dose primaquine (SLDP) in pediatric uncomplicated malaria patients | Zanzibar (Multiple) | 2017  | S                | 143         | 2-60           | 117                       | 134                           |
| Study of transmission of Plasmodium falciparum to colony reared mosquitos                                                                         | Mainland (Bagamoyo) | 2018  | A                | 40          | 7-16           | 34                        | 0                             |
| Parasite clearance study of artemether-lumefantrine (AL)                                                                                          | Mainland (Bagamoyo) | 2018  | S                | 138         | 2-11           | 110                       | 123                           |

405

406

†Asymptomatic (A) or Symptomatic (S).

407 **Table 2. Drug resistance polymorphism prevalence in Zanzibar and coastal mainland Tanzania.**

408

| Mutation      | Zanzibar                  |             |                      | Mainland                  |             |                      |
|---------------|---------------------------|-------------|----------------------|---------------------------|-------------|----------------------|
|               | Mutant Allele Prevalence‡ | CI‡         | # Genotyped Samples§ | Mutant Allele Prevalence‡ | CI‡         | # Genotyped Samples§ |
| Pfcrt-M74I    | 0.054                     | 0.026-0.098 | 184                  | 0.000                     | 0-0.034     | 106                  |
| Pfcrt-N75E    | 0.054                     | 0.026-0.098 | 184                  | 0.000                     | 0-0.034     | 106                  |
| Pfcrt-K76T    | 0.054                     | 0.026-0.098 | 184                  | 0.000                     | 0-0.034     | 106                  |
| Pfdhfr-A16V   | 0.000                     | 0-0.021     | 173                  | 0.000                     | 0-0.032     | 112                  |
| Pfdhfr-N51I   | 0.977                     | 0.943-0.994 | 177                  | 0.964                     | 0.911-0.99  | 112                  |
| Pfdhfr-C59R   | 0.971                     | 0.934-0.991 | 174                  | 0.945                     | 0.884-0.98  | 109                  |
| Pfdhfr-S108N  | 1.000                     | 0.98-1      | 179                  | 1.000                     | 0.965-1     | 104                  |
| Pfdhfr-S108T  | 0.000                     | 0-0.02      | 179                  | 0.000                     | 0-0.035     | 104                  |
| Pfdhfr-I164L  | 0.000                     | 0-0.02      | 184                  | 0.000                     | 0-0.037     | 98                   |
| Pfdhps-A437G  | 1.000                     | 0.98-1      | 182                  | 1.000                     | 0.968-1     | 115                  |
| Pfdhps-K540E  | 0.955                     | 0.913-0.98  | 178                  | 0.964                     | 0.91-0.99   | 111                  |
| Pfdhps-A581G  | 0.044                     | 0.019-0.085 | 181                  | 0.107                     | 0.058-0.175 | 122                  |
| Pfk13-K189N   | 0.023                     | 0.006-0.058 | 174                  | 0.000                     | 0-0.04      | 90                   |
| Pfk13-K189T   | 0.078                     | 0.042-0.13  | 166                  | 0.095                     | 0.042-0.179 | 84                   |
| Pfmdr1-N86Y   | 0.011                     | 0.001-0.04  | 180                  | 0.008                     | 0-0.044     | 124                  |
| Pfmdr1-Y184F  | 0.644                     | 0.57-0.714  | 180                  | 0.530                     | 0.435-0.624 | 115                  |
| Pfmdr1-D1246Y | 0.011                     | 0.001-0.039 | 184                  | 0.019                     | 0.002-0.067 | 105                  |
| Pfmdr2-I492V  | 0.430                     | 0.357-0.506 | 179                  | 0.407                     | 0.302-0.518 | 86                   |

409 ‡Prevalence was calculated as described in the methods. 95% CI of these polymorphisms were  
 410 calculated through the Pearson-Klopper method.

411 §The number of genotyped samples per loci is also shown for each polymorphism.

412 **FIGURES**

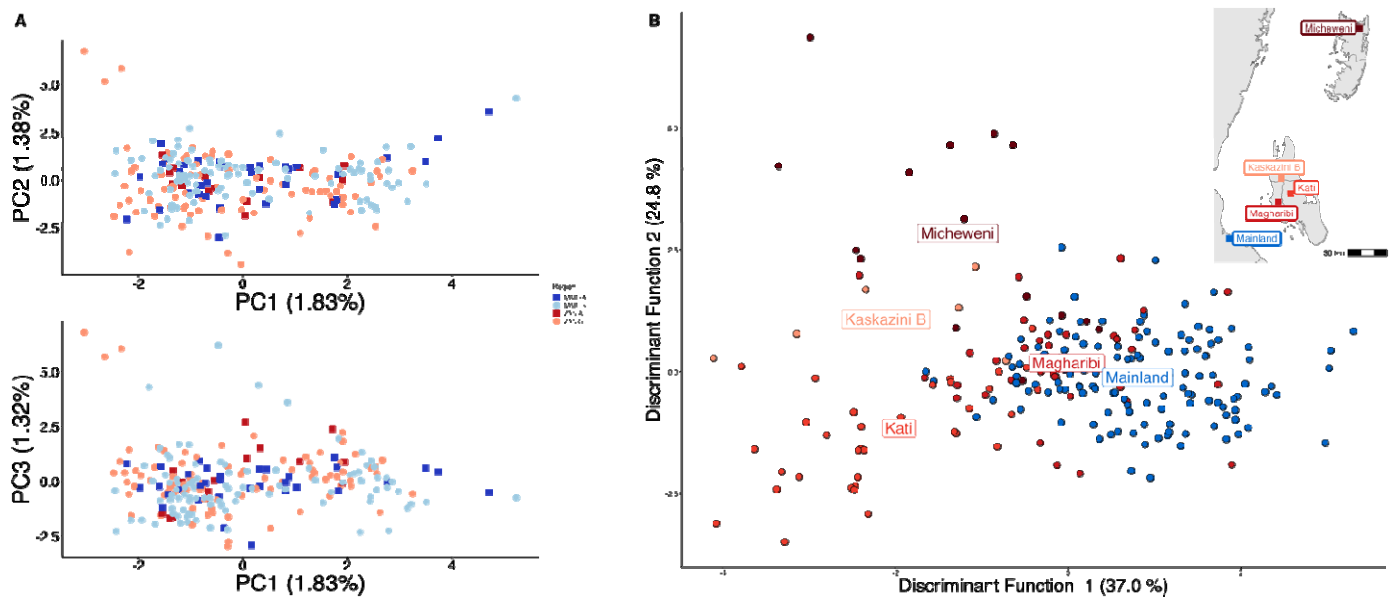

413

414 **Figure 1. Parasites between Zanzibar and coastal mainland Tanzania are highly related but**  
415 **microstructure within Zanzibar is apparent. A)** Principal Component Analysis (PCA) comparing  
416 parasites from symptomatic vs. asymptomatic patients from coastal Tanzania and Zanzibar. Clusters with  
417 an identity by descent (IBD) value of greater than 0.90 were limited to a single representative infection to  
418 prevent local-structure of highly related isolates within *shenhias* from driving clustering. **B)** A Discriminant  
419 Analysis of Principal Components (DAPC) was performed utilizing isolates with unique pseudohaplotypes,  
420 pruning highly related isolates to a single representative infection. Districts were included with at least 5  
421 isolates remaining to have sufficient samples for the DAPC. For plotting the inset map, the district  
422 coordinates (e.g. Mainland, Kati, etc.) are calculated from the averages of the *shenhia* centroids within each  
423 district.

424

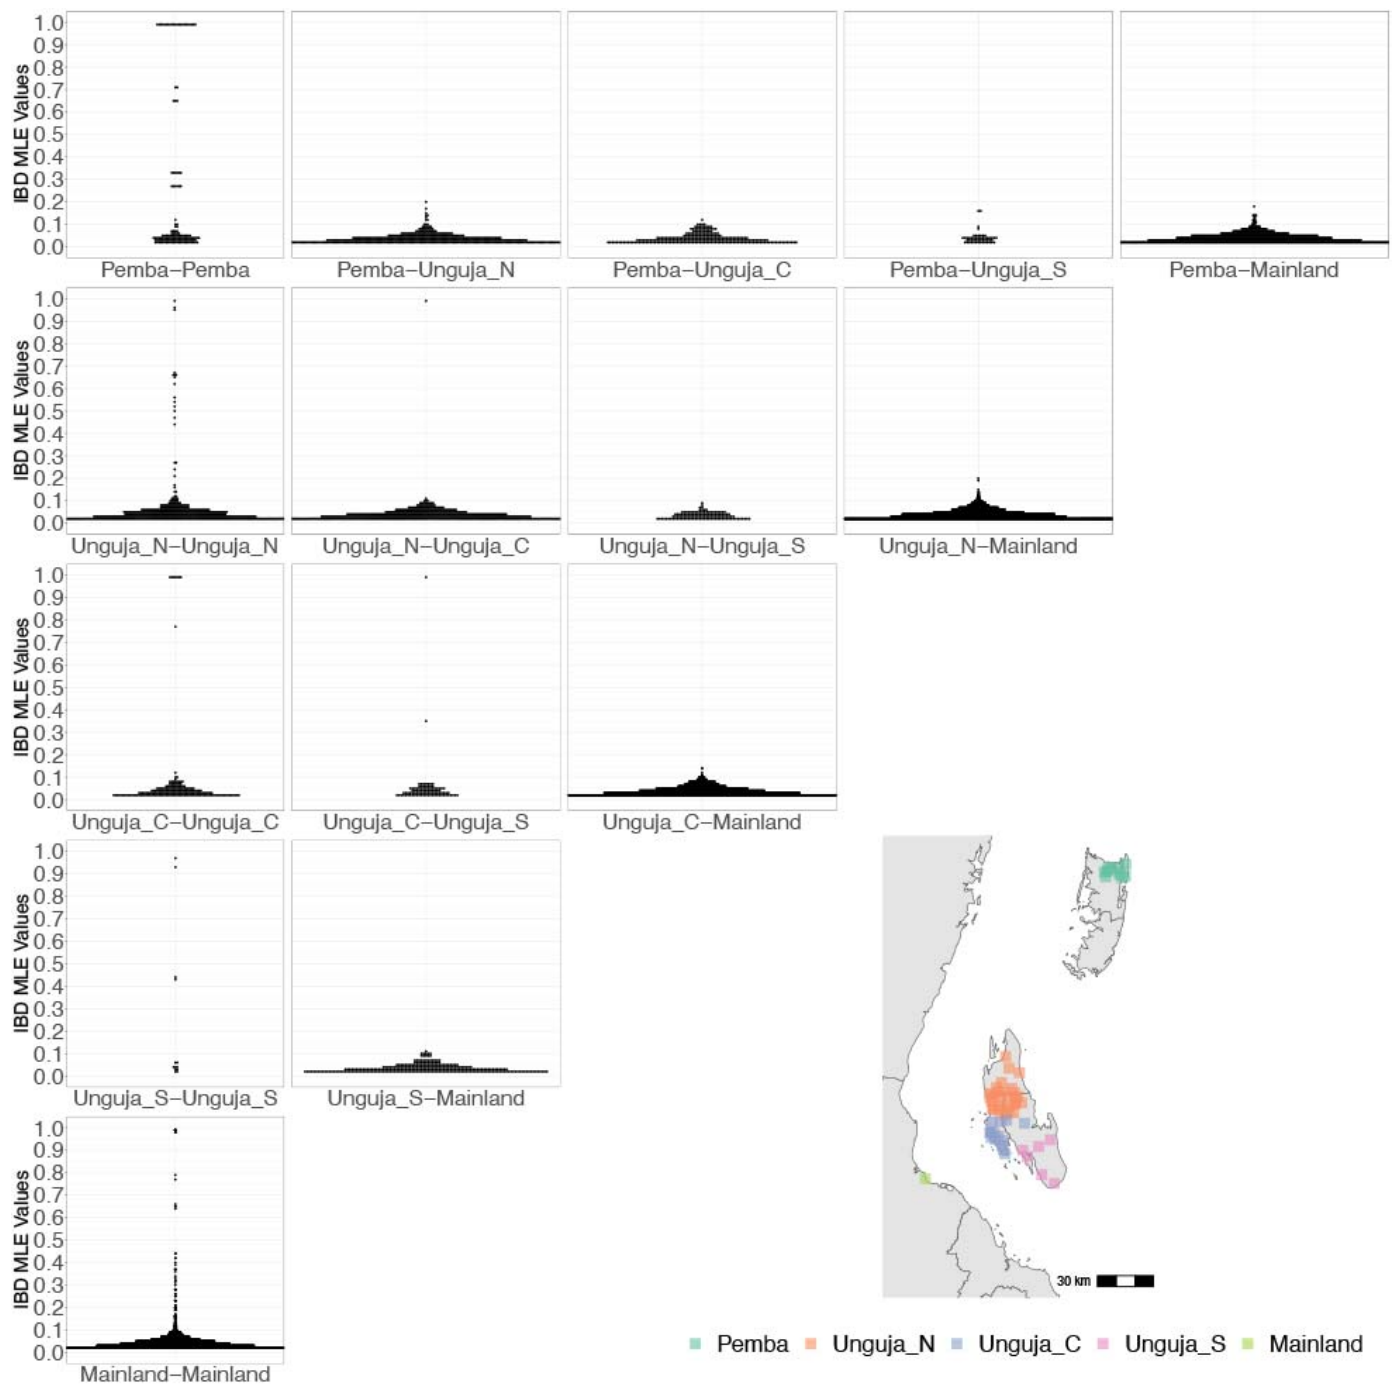

425

426 **Figure 2. Coastal Tanzania and Zanzibari parasites have more highly related pairs within their**  
 427 **given region than between regions.** K-means clustering of *shehia* coordinates was performed using  
 428 geographic coordinates all *shehias* present from the sample population to generate 5 clusters (colored  
 429 boxes). All *shehias* were included to assay pairwise IBD between differences throughout Zanzibar. K-  
 430 means cluster assignments were converted into interpretable geographic names Pemba, Unguja North  
 431 (Unguja\_N), Unguja Central (Unguja\_C), Unguja South (Unguja\_S) and mainland Tanzania (Mainland).  
 432 Pairwise comparisons of within cluster IBD (column 1 of IBD distribution plots) and between cluster IBD  
 433 (column 2-5 of IBD distribution plots) was done for all clusters. All IBD values greater than 0 were plotted  
 434 for each comparison. In general, within cluster IBD had more pairwise comparisons containing high IBD



435 identity.

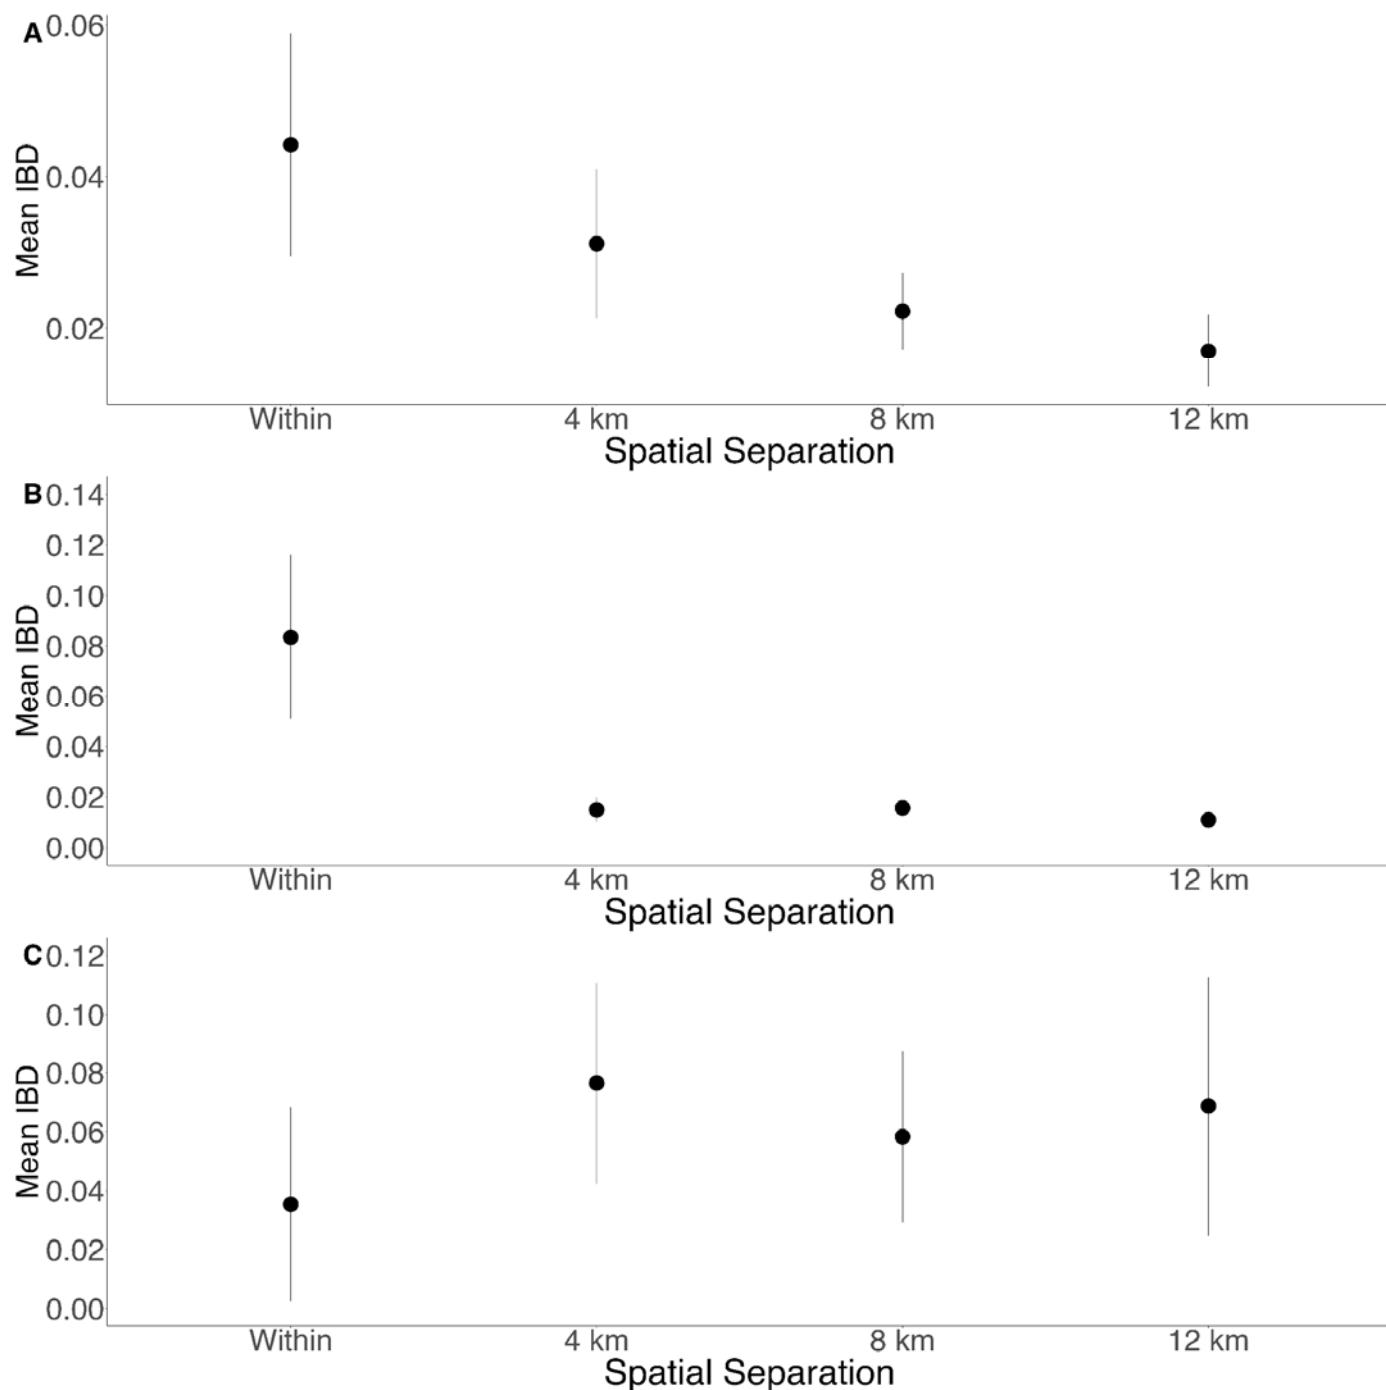

436

437 **Figure 3. Isolation by distance is shown between all Zanzibari parasites (A), only Unguja parasites**  
438 **(B) and only Pemba parasites (C).** Samples were analyzed based on geographic location, Zanzibar  
439 (N=136) (A), Unguja (N=105) (B) or Pemba (N=31) (C) and greater circle (GC) distances between pairs of  
440 parasite isolates were calculated based on *shehia* centroid coordinates. These distances were binned at  
441 4km increments out to 12 km. IBD beyond 12km is shown in **Supplemental Figure 8**. The maximum GC  
442 distance for all of Zanzibar was 135km, 58km on Unguja and 12km on Pemba. The mean IBD and 95% CI  
443 is plotted for each bin.

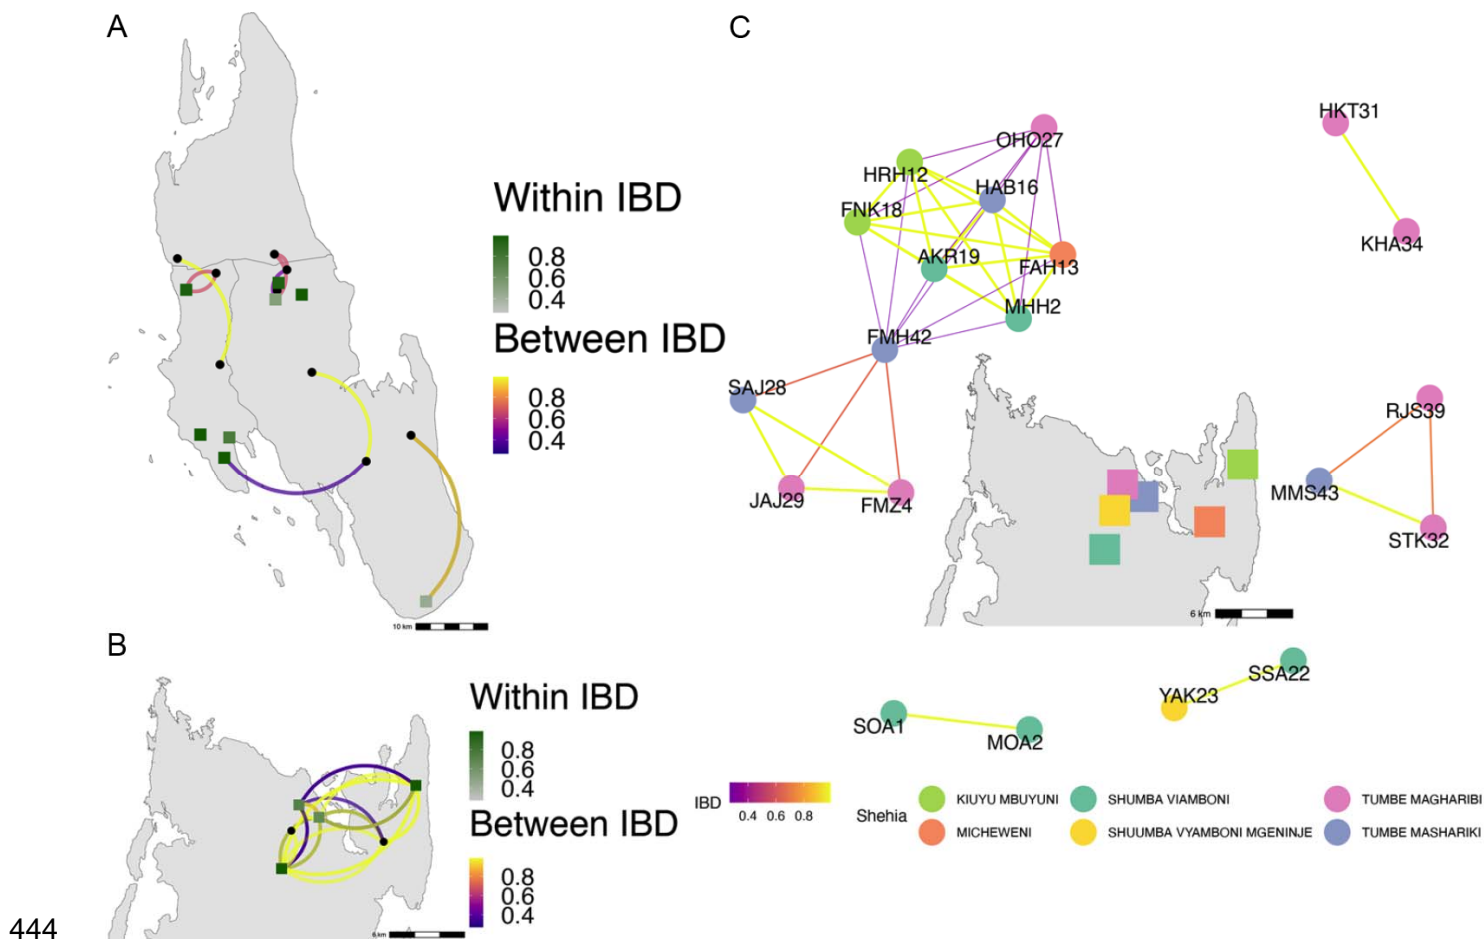

444

445 **Figure 4. Highly related pairs span long distances across Zanzibar.** Sample pairs were filtered to  
 446 have IBD estimates of 0.25 or greater. Within *shehia* pairwise IBD estimates are shown within Unguja  
 447 (**Panel A**) and Pemba (**Panel B**) as single points, with dark orange representing the greatest degree of  
 448 IBD. *Shehias* labeled with black dots do not have within IBD estimates of .25 or greater. Between *shehia*  
 449 IBD reflects pairs of parasites with IBD greater than or equal to 0.25, with the color of the connecting arc  
 450 representing the degree of IBD and yellow representing maximal connectivity. **Panel C** shows the network  
 451 of highly related pairs (IBD >0.25) within and between the 6 northern Pemba *shehias* (note: Micheweni is  
 452 a *shehia* in Micheweni district). Samples (nodes) are colored by *shehia* and IBD estimates (edges) are  
 453 represented on a continuous scale with increasing width and yellow-shading indicating higher IBD.

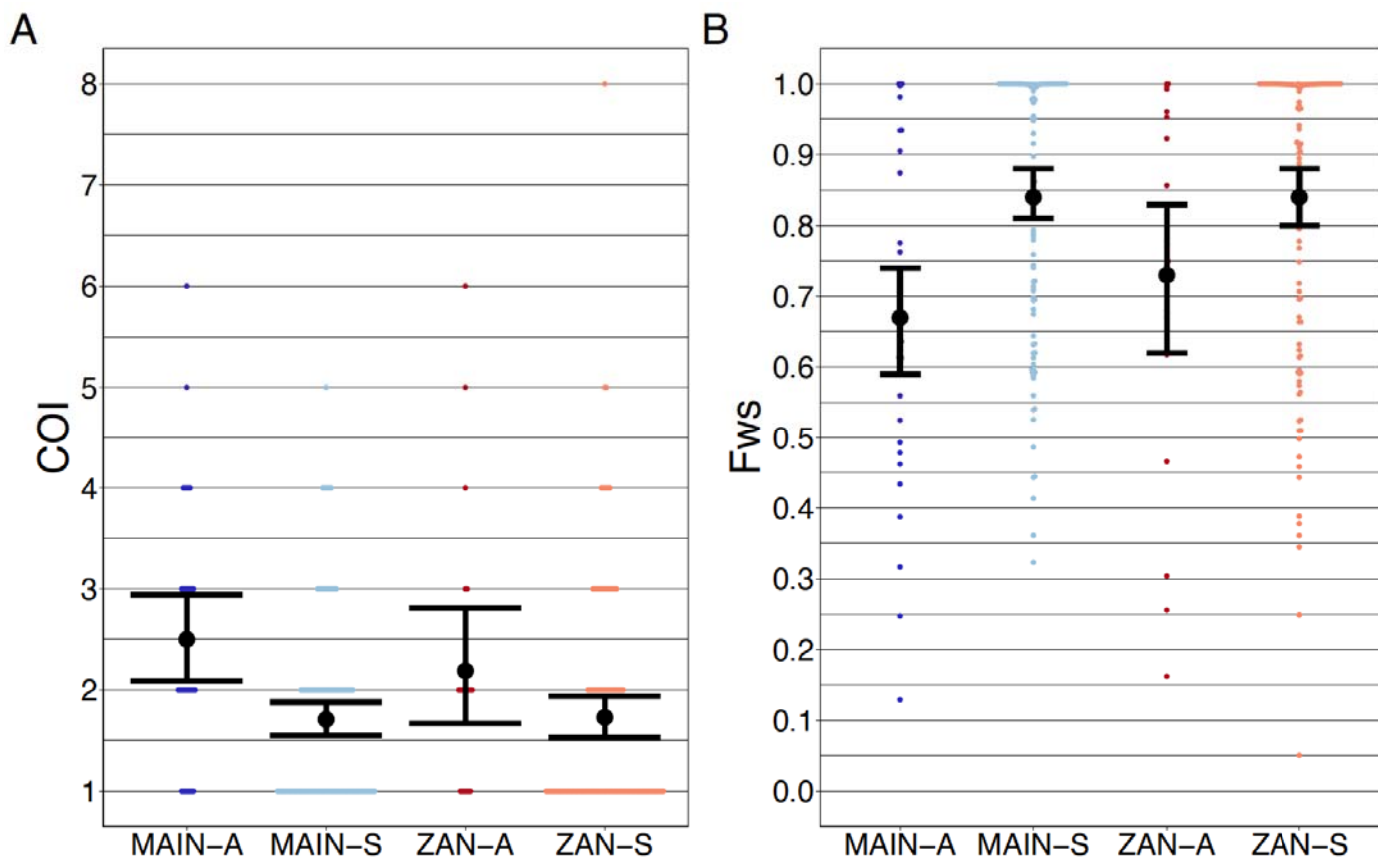

454

455 **Figure 5. Complexity of infection (COI) and Fws metric shows a higher COI and lower Fws in**  
456 **asymptomatic than symptomatic infections in both mainland Tanzania and Zanzibar isolates.** COI  
457 (A) was estimated by the REAL McCOIL's categorical method (H.-H. Chang et al., 2017). Mean COI for  
458 asymptomatic was greater than symptomatic infections for all regions (MAIN-A: 2.5 (2.1-2.9), MAIN-S: 1.7  
459 (1.6-1.9),  $p < 0.05$ , Wilcoxon-Mann-Whitney test and ZAN-A: 2.2 (1.7-2.8), ZAN-S: 1.7 (1.5-1.9),  $p = 0.05$ ,  
460 Wilcoxon-Mann-Whitney test). Fws (B) was estimated utilizing the formula,  $(1 - H_w)/H_p$ , where  $H_w$  is the  
461 within-sample heterozygosity and  $H_p$  is the heterozygosity across the population. Mean Fws was less in  
462 asymptomatic than symptomatic samples (MAIN-A: 0.67 (0.6-0.7), MAIN-S: 0.85 (0.8-0.9),  $p < 0.05$ ,  
463 Wilcoxon-Mann-Whitney test and ZAN-A: 0.73 (0.6-0.8), ZAN-S: 0.84 (0.8-0.9),  $p = 0.05$ , Wilcoxon-Mann-  
464 Whitney test). A nonparametric bootstrap was applied to calculate the mean and 95% confidence interval  
465 (C) from the COI and Fws values.

## 466 REFERENCES

- 467 Alegana, V. A., Macharia, P. M., Muchiri, S., Mumo, E., Oyugi, E., Kamau, A., Chacky, F., Thawer, S.,  
468 Molteni, F., Rutazanna, D., Maiteki-Sebuguzi, C., Gonahasa, S., Noor, A. M., & Snow, R. W.  
469 (2021). Plasmodium falciparum parasite prevalence in East Africa: Updating data for malaria  
470 stratification. *PLOS Global Public Health*, 1(12), e0000014.
- 471 Aydemir, O., Janko, M., Hathaway, N. J., Verity, R., Mwandagalirwa, M. K., Tshetu, A. K., Tessema, S. K.,  
472 Marsh, P. W., Tran, A., Reimonn, T., Ghani, A. C., Ghansah, A., Juliano, J. J., Greenhouse, B. R.,  
473 Emch, M., Meshnick, S. R., & Bailey, J. A. (2018). Drug-Resistance and Population Structure of  
474 Plasmodium falciparum Across the Democratic Republic of Congo Using High-Throughput  
475 Molecular Inversion Probes. *The Journal of Infectious Diseases*, 218(6), 946–955.
- 476 Barry, A., Bradley, J., Stone, W., Guelbeogo, M. W., Lanke, K., Ouedraogo, A., Soulama, I., Nébié, I.,  
477 Serme, S. S., Grignard, L., Patterson, C., Wu, L., Briggs, J. J., Janson, O., Awandu, S. S.,  
478 Ouedraogo, M., Tarama, C. W., Kargougou, D., Zongo, S., ... Bousema, T. (2021). Higher  
479 gametocyte production and mosquito infectivity in chronic compared to incident Plasmodium  
480 falciparum infections. *Nature Communications*, 12(1), 2443.
- 481 Bisanzio, D., Lalji, S., Abbas, F. B., Ali, M. H., Hassan, W., Mkali, H. R., Al-Mafazy, A.-W., Joseph, J. J.,  
482 Nyinondi, S., Kitojo, C., Serbantez, N., Reaves, E., Eckert, E., Ngondi, J. M., & Reithinger, R.  
483 (2023). Spatiotemporal dynamics of malaria in Zanzibar, 2015–2020. *BMJ Global Health*, 8(1),  
484 e009566.
- 485 Björkman, A., & Morris, U. (2020). Why Asymptomatic Plasmodium falciparum Infections Are Common in  
486 Low-Transmission Settings. *Trends in Parasitology*, 36(11), 898–905.
- 487 Björkman, A., Shakely, D., Ali, A. S., Morris, U., Mkali, H., Abbas, A. K., Al-Mafazy, A. W., Haji, K. A.,  
488 Mcha, J., Omar, R., Cook, J., Elfving, K., Petzold, M., Sachs, M. C., Aydin-Schmidt, B., Drakeley,  
489 C., Msellem, M., & Martensson, A. (2019). From high to low malaria transmission in Zanzibar-  
490 challenges and opportunities to achieve elimination. *BMC Medicine*, 17(1), 14.
- 491 Bousema, T., Griffin, J. T., Sauerwein, R. W., Smith, D. L., Churcher, T. S., Takken, W., Ghani, A.,  
492 Drakeley, C., & Gosling, R. (2012). Hitting hotspots: spatial targeting of malaria for control and  
493 elimination. *PLoS Medicine*, 9(1), e1001165.
- 494 Bousema, T., Stresman, G., Baidjoe, A. Y., Bradley, J., Knight, P., Stone, W., Osofi, V., Makori, E.,  
495 Owaga, C., Odongo, W., China, P., Shagari, S., Doumbo, O. K., Sauerwein, R. W., Kariuki, S.,  
496 Drakeley, C., Stevenson, J., & Cox, J. (2016). The impact of hotspot-targeted interventions on  
497 malaria transmission in Rachuonyo South District in the western Kenyan highlands: A cluster-  
498 randomized controlled trial. *PLoS Medicine*, 13(4), e1001993.
- 499 Chang, H. H., Wesolowski, A., Sinha, I., Jacob, C. G., Mahmud, A., Uddin, D., Zaman, S. I., Hossain, M.  
500 A., Faiz, M. A., Ghose, A., Sayeed, A. A., Rahman, M. R., Islam, A., Karim, M. J., Rezwan, M. K.,  
501 Shamsuzzaman, A. K. M., Jhora, S. T., Aktaruzzaman, M. M., Drury, E., ... Buckee, C. (2019).  
502 Mapping imported malaria in Bangladesh using parasite genetic and human mobility data. *ELife*, 8.  
503 <https://doi.org/10.7554/eLife.43481>
- 504 Chang, H.-H., Worby, C. J., Yeka, A., Nankabirwa, J., Kanya, M. R., Staedke, S. G., Dorsey, G., Murphy,  
505 M., Neafsey, D. E., Jeffreys, A. E., Hubbart, C., Rockett, K. A., Amato, R., Kwiatkowski, D. P.,  
506 Buckee, C. O., & Greenhouse, B. (2017). THE REAL McCOIL: A method for the concurrent  
507 estimation of the complexity of infection and SNP allele frequency for malaria parasites. *PLoS*  
508 *Computational Biology*, 13(1), e1005348.
- 509 Collins, K. A., Ceesay, S., Drammeh, S., Jaiteh, F. K., Guery, M. A., Lanke, K., Grignard, L., Stone, W.,  
510 Conway, D. J., D'Alessandro, U., Bousema, T., & Claessens, A. (2022). A Cohort Study on the  
511 Duration of *Plasmodium falciparum* Infections During the Dry Season in The Gambia. In *The*  
512 *Journal of Infectious Diseases* (Vol. 226, Issue 1, pp. 128–137).  
513 <https://doi.org/10.1093/infdis/jiac116>
- 514 Conway, D. J., Greenwood, B. M., & McBride, J. S. (1991). The epidemiology of multiple-clone  
515 Plasmodium falciparum infections in Gambian patients. *Parasitology*, 103 Pt 1, 1–6.
- 516 Djimdé, A., Doumbo, O. K., Cortese, J. F., Kayentao, K., Doumbo, S., Diourté, Y., Coulibaly, D., Dicko, A.,  
517 Su, X. Z., Nomura, T., Fidock, D. A., Wellems, T. E., & Plowe, C. V. (2001). A molecular marker for  
518 chloroquine-resistant falciparum malaria. *The New England Journal of Medicine*, 344(4), 257–263.

- 519 Earland, D., Buchwald, A. G., Sixpence, A., Chimenya, M., Damson, M., Seydel, K. B., Mathanga, D. P.,  
520 Taylor, T. E., & Laufer, M. K. (2019). Impact of Multiplicity of Plasmodium falciparum Infection on  
521 Clinical Disease in Malawi. *The American Journal of Tropical Medicine and Hygiene*, 101(2), 412–  
522 415.
- 523 Fola, A. A., Moser, K. A., Aydemir, O., Hennelly, C., Kobayashi, T., Shields, T., Hamapumbu, H.,  
524 Musonda, M., Katowa, B., Matoba, J., Stevenson, J. C., Norris, D. E., Thuma, P. E., Wesolowski,  
525 A., Moss, W. J., Bailey, J. A., Juliano, J. J., & Southern, Central Africa International Center of  
526 Excellence for Malaria Research (ICEMR). (2023). Temporal and spatial analysis of Plasmodium  
527 falciparum genomics reveals patterns of parasite connectivity in a low-transmission district in  
528 Southern Province, Zambia. *Malaria Journal*, 22(1), 208.
- 529 Holmgren, G., Gil, J. P., Ferreira, P. M., Veiga, M. I., Obonyo, C. O., & Björkman, A. (2006). Amodiaquine  
530 resistant Plasmodium falciparum malaria in vivo is associated with selection of pfcr1 76T and  
531 pfmdr1 86Y. *Infection, Genetics and Evolution: Journal of Molecular Epidemiology and  
532 Evolutionary Genetics in Infectious Diseases*, 6(4), 309–314.
- 533 Holzschuh, A., Lerch, A., Gerlovina, I., Fakih, B. S., Al-Mafazy, A.-W. H., Reaves, E. J., Ali, A., Abbas, F.,  
534 Ali, M. H., Ali, M. A., Hetzel, M. W., Yukich, J., & Koepfli, C. (2023). Multiplexed ddPCR-amplicon  
535 sequencing reveals isolated Plasmodium falciparum populations amenable to local elimination in  
536 Zanzibar, Tanzania. *Nature Communications*, 14(1), 3699.
- 537 Huestis, D. L., Dao, A., Diallo, M., Sanogo, Z. L., Samake, D., Yaro, A. S., Ousman, Y., Linton, Y. M.,  
538 Krishna, A., Veru, L., Krajacich, B. J., Faiman, R., Florio, J., Chapman, J. W., Reynolds, D. R.,  
539 Weetman, D., Mitchell, R., Donnelly, M. J., Talamas, E., ... Lehmann, T. (2019). Windborne long-  
540 distance migration of malaria mosquitoes in the Sahel. *Nature*, 574(7778), 404–408.
- 541 Jombart, T. (2008). adegenet: a R package for the multivariate analysis of genetic markers. *Bioinformatics  
542 (Oxford, England)*, 24(11), 1403–1405.
- 543 Kimenyi, K. M., Wamae, K., Ngoi, J. M., de Laurent, Z. R., Ndwiga, L., Osofi, V., Obiero, G., Abdi, A. I.,  
544 Bejon, P., & Ochola-Oyier, L. I. (2022). Maintenance of high temporal Plasmodium falciparum  
545 genetic diversity and complexity of infection in asymptomatic and symptomatic infections in Kilifi,  
546 Kenya from 2007 to 2018. *Malaria Journal*, 21(1), 192.
- 547 Kun, J. F., Schmidt-Ott, R. J., Lehman, L. G., Lell, B., Luckner, D., Greve, B., Matousek, P., & Kremsner,  
548 P. G. (1998). Merozoite surface antigen 1 and 2 genotypes and rosetting of Plasmodium  
549 falciparum in severe and mild malaria in Lambaréné, Gabon. *Transactions of the Royal Society of  
550 Tropical Medicine and Hygiene*, 92(1), 110–114.
- 551 Lagnika, H. O., Moussiliou, A., Agonhossou, R., Sovegnon, P., Djihinto, O. Y., Medjigbodo, A. A., Djossou,  
552 L., Amoah, L. E., Ogouyemi-Hounto, A., & Djogbenou, L. S. (2022). Plasmodium falciparum msp1  
553 and msp2 genetic diversity in parasites isolated from symptomatic and asymptomatic malaria  
554 subjects in the South of Benin. *Parasitology Research*, 121(1), 167–175.
- 555 Le Menach, A., Tatem, A. J., Cohen, J. M., Hay, S. I., Randell, H., Patil, A. P., & Smith, D. L. (2011).  
556 Travel risk, malaria importation and malaria transmission in Zanzibar. *Scientific Reports*, 1, 93.
- 557 Lindblade, K. A., Steinhardt, L., Samuels, A., Kachur, S. P., & Slutsker, L. (2013). The silent threat:  
558 asymptomatic parasitemia and malaria transmission. *Expert Review of Anti-Infective Therapy*,  
559 11(6), 623–639.
- 560 Lipner, E., Law, M., Barnett, E., Keystone, J., von Sonnenburg, F., Loutan, L., Prevots, D., Klion, A., &  
561 Nutman, T. (2011). Travel Patterns and Imported Plasmodium falciparum Rates among Zanzibar  
562 Residents. In *Hospitality and Health* (pp. 78–92). Apple Academic Press.
- 563 Mkali, H. R., Lalji, S. M., Al-Mafazy, A.-W., Joseph, J. J., Mwaipape, O. S., Ali, A. S., Abbas, F. B., Ali, M.  
564 H., Hassan, W. S., Reaves, E. J., Kitojo, C., Serbantez, N., Kabula, B. I., Nyinondi, S. S., McKay,  
565 M., Cressman, G., Ngondi, J. M., & Reithinger, R. (2023). How Real-Time Case-Based Malaria  
566 Surveillance Helps Zanzibar Get a Step Closer to Malaria Elimination: Description of Operational  
567 Platform and Resources. *Global Health, Science and Practice*, 11(5).  
568 <https://doi.org/10.9745/GHSP-D-22-00522>
- 569 Monroe, A., Mihayo, K., Okumu, F., Finda, M., Moore, S., Koenker, H., Lynch, M., Haji, K., Abbas, F., Ali,  
570 A., Greer, G., & Harvey, S. (2019). Human behaviour and residual malaria transmission in  
571 Zanzibar: findings from in-depth interviews and direct observation of community events. *Malaria*

- 572 *Journal*, 18(1), 220.
- 573 Morgan, A. P., Brazeau, N. F., Ngasala, B., Mhamilawa, L. E., Denton, M., Msellem, M., Morris, U., Filer,  
574 D. L., Aydemir, O., Bailey, J. A., Parr, J. B., Mårtensson, A., Bjorkman, A., & Juliano, J. J. (2020).  
575 *Falciparum malaria from coastal Tanzania and Zanzibar remains highly connected despite*  
576 *effective control efforts on the archipelago. Malaria Journal*, 19(1), 47.
- 577 Morris, U., Msellem, M. I., Mkali, H., Islam, A., Aydin-Schmidt, B., Jovel, I., Shija, S. J., Khamis, M., Ali, S.  
578 M., Hodzic, L., Magnusson, E., Poirot, E., Bennett, A., Sachs, M. C., Tarning, J., Mårtensson, A.,  
579 Ali, A. S., & Björkman, A. (2018). A cluster randomised controlled trial of two rounds of mass drug  
580 administration in Zanzibar, a malaria pre-elimination setting-high coverage and safety, but no  
581 significant impact on transmission. *BMC Medicine*, 16(1), 215.
- 582 Morris, U., Xu, W., Msellem, M. I., Schwartz, A., Abass, A., Shakely, D., Cook, J., Bhattarai, A., Petzold,  
583 M., Greenhouse, B., Ali, A. S., Bjorkman, A., Froberg, G., & Martensson, A. (2015). Characterising  
584 temporal trends in asymptomatic Plasmodium infections and transporter polymorphisms during  
585 transition from high to low transmission in Zanzibar, 2005-2013. *Infection, Genetics and Evolution:*  
586 *Journal of Molecular Epidemiology and Evolutionary Genetics in Infectious Diseases*, 33, 110–117.
- 587 Moser, K. A., Madebe, R. A., Aydemir, O., Chiduo, M. G., Mandara, C. I., Rumisha, S. F., Chaky, F.,  
588 Denton, M., Marsh, P. W., Verity, R., Watson, O. J., Ngasala, B., Mkude, S., Molteni, F., Njau, R.,  
589 Warsame, M., Mandike, R., Kabanywany, A. M., Mahende, M. K., ... Bailey, J. A. (2021).  
590 Describing the current status of Plasmodium falciparum population structure and drug resistance  
591 within mainland Tanzania using molecular inversion probes. *Molecular Ecology*, 30(1), 100–113.
- 592 Msellem, M., Morris, U., Soe, A., Abbas, F. B., Ali, A.-W., Barnes, R., Frumento, P., Ali, A. S., Mårtensson,  
593 A., & Björkman, A. (2020). Increased sensitivity of Plasmodium falciparum to  
594 artesunate/amodiaquine despite 14 years as first-line malaria treatment, Zanzibar. *Emerging*  
595 *Infectious Diseases*, 26(8), 1767–1777.
- 596 Neafsey, D. E., Taylor, A. R., & MacInnis, B. L. (2021). Advances and opportunities in malaria population  
597 genomics. *Nature Reviews. Genetics*, 22(8), 502–517.
- 598 Okell, L. C., Griffin, J. T., Kleinschmidt, I., Hollingsworth, T. D., Churcher, T. S., White, M. J., Bousema, T.,  
599 Drakeley, C. J., & Ghani, A. C. (2011). The potential contribution of mass treatment to the control  
600 of Plasmodium falciparum malaria. *PLoS One*, 6(5), e20179.
- 601 Patel, J. C., Taylor, S. M., Juliao, P. C., Parobek, C. M., Janko, M., Gonzalez, L. D., Ortiz, L., Padilla, N.,  
602 Tshetu, A. K., Emch, M., Udhayakumar, V., Lindblade, K., & Meshnick, S. R. (2014). Genetic  
603 Evidence of Importation of Drug-Resistant Plasmodium falciparum to Guatemala from the  
604 Democratic Republic of the Congo. *Emerging Infectious Diseases*, 20(6), 932–940.
- 605 Robert, F., Ntoumi, F., Angel, G., Candito, D., Rogier, C., Fandeur, T., Sarthou, J. L., & Mercereau-  
606 Puijalon, O. (1996). Extensive genetic diversity of Plasmodium falciparum isolates collected from  
607 patients with severe malaria in Dakar, Senegal. *Transactions of the Royal Society of Tropical*  
608 *Medicine and Hygiene*, 90(6), 704–711.
- 609 Roh, M. E., Tessema, S. K., Murphy, M., Nhlabathi, N., Mkhonta, N., Vilakati, S., Ntshalintshali, N., Saini,  
610 M., Maphalala, G., Chen, A., & Others. (2019). High genetic diversity of Plasmodium falciparum in  
611 the low-transmission setting of the Kingdom of Eswatini. *The Journal of Infectious Diseases*,  
612 220(8), 1346–1354.
- 613 Sane, R., Talla, C., Diouf, B., Sarr, F. D., Diagne, N., Faye, J., Badiane, A., Sembène, P. M., Sokhna, C.,  
614 Toure-Balde, A., & Niang, M. (2019). Low genetic diversity and complexity of submicroscopic  
615 Plasmodium falciparum infections among febrile patients in low transmission areas in Senegal.  
616 *PLoS One*, 14(4), e0215755.
- 617 Sarah-Matio, E. M., Guillochon, E., Nsango, S. E., Abate, L., Ngou, C. M., Bouopda, G. A., Feufack-  
618 Donfack, L. B., Bayibéki, A. N., Tchioffo Tsapi, M., Talman, A., Marin-Menendez, A., Ayong, L.,  
619 Claessens, A., Lefèvre, T., Berry, A., & Morlais, I. (2022). Genetic Diversity of Plasmodium  
620 falciparum and Distribution of Antimalarial Drug Resistance Mutations in Symptomatic and  
621 Asymptomatic Infections. *Antimicrobial Agents and Chemotherapy*, 66(8), e0018822.
- 622 Searle, K. M., Katowa, B., Kobayashi, T., Siame, M. N. S., Mharakurwa, S., Carpi, G., Norris, D. E.,  
623 Stevenson, J. C., Thuma, P. E., Moss, W. J., & Southern Africa International Centers of Excellence  
624 for Malaria Research. (2017). Distinct parasite populations infect individuals identified through

- 625 passive and active case detection in a region of declining malaria transmission in southern  
626 Zambia. *Malaria Journal*, 16(1), 154.
- 627 Sisowath, C., Strömberg, J., Mårtensson, A., Msellem, M., Obondo, C., Björkman, A., & Gil, J. P. (2005).  
628 In vivo selection of *Plasmodium falciparum* pfm<sub>dr1</sub> 86N coding alleles by artemether-lumefantrine  
629 (Coartem). *The Journal of Infectious Diseases*, 191(6), 1014–1017.
- 630 Sumner, K. M., Freedman, E., Abel, L., Obala, A., Pence, B. W., Wesolowski, A., Meshnick, S. R.,  
631 Prudhomme-O'Meara, W., & Taylor, S. M. (2021). Genotyping cognate *Plasmodium falciparum* in  
632 humans and mosquitoes to estimate onward transmission of asymptomatic infections. *Nature*  
633 *Communications*, 12(1), 909.
- 634 Tanabe, K., Zollner, G., Vaughan, J. A., Sattabongkot, J., Khuntirat, B., Honma, H., Mita, T., Tsuboi, T., &  
635 Coleman, R. (2015). *Plasmodium falciparum*: genetic diversity and complexity of infections in an  
636 isolated village in western Thailand. *Parasitology International*, 64(3), 260–266.
- 637 Tatem, A. J., Qiu, Y., Smith, D. L., Sabot, O., Ali, A. S., & Moonen, B. (2009). The use of mobile phone  
638 data for the estimation of the travel patterns and imported *Plasmodium falciparum* rates among  
639 Zanzibar residents. *Malaria Journal*, 8, 287.
- 640 Topazian, H. M., Moser, K. A., Ngasala, B., Oluoch, P. O., Forconi, C. S., Mhamilawa, L. E., Aydemir, O.,  
641 Kharabora, O., Deutsch-Feldman, M., Read, A. F., Denton, M., Lorenzo, A., Mideo, N., Ogutu, B.,  
642 Moormann, A. M., Mårtensson, A., Odwar, B., Bailey, J. A., Akala, H., ... Juliano, J. J. (2022). Low  
643 complexity of infection is associated with molecular persistence of *Plasmodium falciparum* in  
644 Kenya and Tanzania. *Frontiers in Epidemiology*, 2. <https://doi.org/10.3389/fepid.2022.852237>
- 645 Verity, R., Aydemir, O., Brazeau, N. F., Watson, O. J., Hathaway, N. J., Mwandagalirwa, M. K., Marsh, P.  
646 W., Thwai, K., Fulton, T., Denton, M., Morgan, A. P., Parr, J. B., Tumwebaze, P. K., Conrad, M.,  
647 Rosenthal, P. J., Ishengoma, D. S., Ngondi, J., Gutman, J., Mulenga, M., ... Juliano, J. J. (2020).  
648 The impact of antimalarial resistance on the genetic structure of *Plasmodium falciparum* in the  
649 DRC. *Nature Communications*, 11(1), 2107.
- 650 World Health Organization. (2020). *Report on antimalarial drug efficacy, resistance and response: 10*  
651 *years of surveillance (2010-2019)*. World Health Organization.
- 652 World Health Organization. (2022). *World malaria report 2022*. World Health Organization.
